# Supplementary material
Source: ML conference proceedings conference paper supplement (https://openreview.net/forum?id=MojU63gze2)
Supplement: supplementary_material [file attachment]

Additional items:

- URL to the dataset website: <https://siplab.ethz.ch/datasets/wildppg-neurips-2024/>  
Website will receive facelift in case of paper acceptance
- URL directly to the dataset: <https://polybox.ethz.ch/index.php/s/NWTuyNojU7aya1y>
- URL to code: <https://gitfront.io/r/Palstek/T8EvxApuukV/2024-wildppg-neurips-code/>  
To avoid issues with the gitfront platform during review, the repository contents are also provided as .zip through the dataset download link.
- Licensing as outlined in the paper and license files in the code repository:
  - Data is released under CC BY-NC-SA 4.0
  - Code is released under GPL-3
- Author statement as included in the paper appendix:
  - The authors bear all responsibility in case of violation of rights.
- Hosting, licensing, and maintenance plan is as outlined in the paper:
  - Code will be published on github
  - All data, a code image, and the project website are hosted on ETH Zurich servers with long-running maintenance intended for long-term availability.
