# Supplementary material
Source: ML conference proceedings conference paper supplement (https://openreview.net/forum?id=MojU63gze2)
Supplement: supplementary_material [file attachment]

# WildPPG data file structure

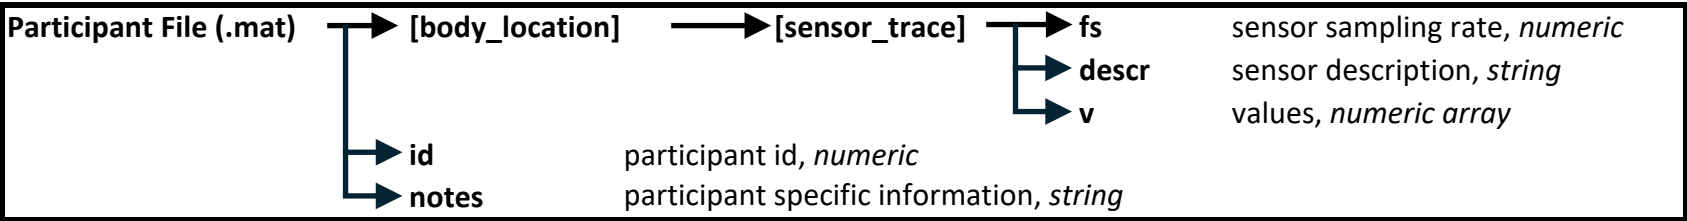

## available values

|                 |             |                          |                                   |
|-----------------|-------------|--------------------------|-----------------------------------|
| [body_location] | head        |                          |                                   |
|                 | ankle       |                          |                                   |
|                 | sternum     |                          |                                   |
|                 | wrist       |                          |                                   |
|                 |             |                          |                                   |
| [sensor_trace]  | acc_x       | accelerometer X-Axis     | fs=128 Hz                         |
|                 | acc_y       | accelerometer Y-Axis     | fs=128 Hz                         |
|                 | acc_z       | accelerometer Z-Axis     | fs=128 Hz                         |
|                 | altitude    | barometric altitude      | fs=0.5 Hz 8-second sliding window |
|                 | temperature | in-device temperature    | fs=0.5 Hz 8-second sliding window |
|                 | ppg_g       | green PPG                | fs=128 Hz                         |
|                 | ppg_ir      | infrared PPG             | fs=128 Hz                         |
|                 | ppg_r       | red PPG                  | fs=128 Hz                         |
|                 | ecg         | lead I ECG, sternum only | fs=128 Hz                         |

## recordings overview

| participant | board | recording | comment                                                                |
|-------------|-------|-----------|------------------------------------------------------------------------|
| an0         | chest | 12.3 h    | recording interruption of 15 seconds, due to defective battery contact |
|             | head  | 12.3 h    |                                                                        |
|             | ankle | 12.3 h    |                                                                        |
|             | wrist | 12.3 h    |                                                                        |
| e61         | chest | 12.4 h    |                                                                        |
|             | head  | 12.4 h    |                                                                        |
|             | ankle | 12.4 h    |                                                                        |
|             | wrist | 12.4 h    |                                                                        |
| fex         | chest | 13.4 h    | noisy ECG due to electrode issues                                      |
|             | head  | 13.4 h    |                                                                        |
|             | ankle | 13.4 h    |                                                                        |
|             | wrist | 13.4 h    |                                                                        |
| k2s         | chest | 15.2 h    | recording interruption of 53 minutes, due to defective battery contact |
|             | head  | 15.2 h    |                                                                        |
|             | ankle | 15.2 h    |                                                                        |
|             | wrist | 15.2 h    |                                                                        |
| kjd         | chest | 13.4 h    | noisy ECG due to electrode issues                                      |
|             | head  | 13.4 h    |                                                                        |
|             | ankle | 13.4 h    |                                                                        |
|             | wrist | 13.4 h    |                                                                        |
| l38         | chest | 13.3 h    | recording interruption of 27 minutes, due to defective battery contact |
|             | head  | 13.3 h    |                                                                        |
|             | ankle | 13.3 h    |                                                                        |
|             | wrist | 13.3 h    |                                                                        |
| n31         | chest | 13.2 h    |                                                                        |
|             | head  | 13.2 h    |                                                                        |
|             | ankle | 13.2 h    |                                                                        |
|             | wrist | 13.2 h    |                                                                        |
| ngh         | chest | 14.7 h    |                                                                        |
|             | head  | 14.7 h    |                                                                        |
|             | ankle | 14.7 h    |                                                                        |
|             | wrist | 14.7 h    |                                                                        |
| p5d         | chest | 14.5 h    | noisy ECG due to electrode issues                                      |
|             | head  | 14.5 h    |                                                                        |
|             | ankle | 14.5 h    |                                                                        |
|             | wrist | 14.5 h    |                                                                        |
| nan         | chest | 12.5 h    |                                                                        |
|             | head  | 12.5 h    |                                                                        |

|       |       |            |
|-------|-------|------------|
| p3p   | ankle | 12.5 h     |
|       | wrist | 12.5 h     |
| qm9   | chest | 13.2 h     |
|       | head  | 13.2 h     |
|       | ankle | 13.2 h     |
|       | wrist | 13.2 h     |
| ssx   | chest | 12.7 h     |
|       | head  | 12.7 h     |
|       | ankle | 12.7 h     |
|       | wrist | 12.7 h     |
| trh   | chest | 14.4 h     |
|       | head  | 14.4 h     |
|       | ankle | 14.4 h     |
|       | wrist | 14.4 h     |
| tz8   | chest | 14.5 h     |
|       | head  | 14.5 h     |
|       | ankle | 14.5 h     |
|       | wrist | 14.5 h     |
| u7y   | chest | 13.3 h     |
|       | head  | 13.3 h     |
|       | ankle | 13.3 h     |
|       | wrist | 13.3 h     |
| w4p   | chest | 13.9 h     |
|       | head  | 13.9 h     |
|       | ankle | 13.9 h     |
|       | wrist | 13.9 h     |
| total |       | 64 867.2 h |
